# Supplementary material for: Edge-centred chirality-induced enantiopure square-like sulfonylcalix[4]arene-{Co ii 16 } cages for selective (+)-/(−)-α-pinene adsorption
Source: Royal Society of Chemistry journal article supplement (doi:10.1039/d5cc05936d), 2025-12-15
Supplement: d5cc05936d2.xlsx [file d5cc05936d2.xlsx]

## Sheet: SO2CA-Co4-1
temp. 75°C				temp. 80°C				temp. 85°C				temp. 90°C				temp. 95°C
(-)-a-pinene		(+)-a-pinene		(-)-a-pinene		(+)-a-pinene		(-)-a-pinene		(+)-a-pinene		(-)-a-pinene		(+)-a-pinene		(-)-a-pinene		(+)-a-pinene
p, kPa	a,μmol/g	p, kPa	a,μmol/g	p, kPa	a,μmol/g	p, kPa	a,μmol/g	p, kPa	a,μmol/g	p, kPa	a,μmol/g	p, kPa	a,μmol/g	p, kPa	a,μmol/g	p, kPa	a,μmol/g	p, kPa	a,μmol/g
0.002182	78.4388	0.002998	114.84	0.002522	156.827	0.002537	118.817	0.003591	44.3456	0.003359	45.3814	0.0033649	31.3575	0.0034288	32.1407	0.0043182	31.7404	0.0042293	27.3421
0.004363	346.288	0.005996	489.43	0.005045	721.107	0.005074	593.433	0.007182	54.246	0.006718	55.5106	0.0067299	55.3494	0.0068575	55.9472	0.0086364	52.6196	0.0084587	45.7885
0.006545	475.283	0.008995	658.013	0.007567	1023.42	0.007611	996.47	0.010773	69.2323	0.010077	72.2786	0.0101	74.2831	0.0103	75.0135	0.013	67.5083	0.0127	59.7168
0.008727	586.608	0.011993	809.296	0.010089	1257.05	0.010148	1262.99	0.014364	80.7704	0.013436	85.1302	0.0135	89.4098	0.0137	90.5652	0.0173	78.6952	0.0169	70.2501
0.010908	679.181	0.014991	936.193	0.012612	1428.69	0.012685	1517.26	0.017954	89.6907	0.016795	95.3157	0.0168	101.824	0.0171	103.028	0.0216	87.4118	0.0211	78.7492
0.01309	768.011	0.017989	1050.31	0.015134	1585.43	0.015222	1714.27	0.021545	96.7124	0.020154	103.846	0.0202	112.007	0.0206	113.71	0.0259	94.225	0.0254	85.2701
0.015272	842.657	0.020987	1147.5	0.017657	1693.28	0.017759	1868.53	0.025136	102.787	0.023513	111.655	0.0236	120.759	0.024	122.421	0.0302	99.6093	0.0296	90.6965
0.017453	912.619	0.023985	1248.03	0.020179	1780.08	0.020296	2033.93	0.028727	107.813	0.026872	117.719	0.0269	128.347	0.0274	130.206	0.0345	104.222	0.0338	95.2766
0.019635	973.079	0.026984	1325.4	0.022701	1863.31	0.022833	2167.9	0.032318	111.971	0.030231	123.163	0.0303	134.773	0.0309	136.738	0.0389	108.103	0.0381	99.2151
0.021817	1025.28	0.029982	1392.74	0.025224	1936.47	0.02537	2285.96	0.035909	115.571	0.03359	127.571	0.0336	140.233	0.0343	142.268	0.0432	111.526	0.0423	102.628
0.023998	1077.22	0.03298	1460.5	0.027746	1991.62	0.027907	2376.52	0.0395	118.733	0.036949	131.48	0.037	145.287	0.0377	147.256	0.0475	114.57	0.0465	105.667
0.02618	1116.53	0.035978	1513.83	0.030268	2045.17	0.030444	2465.98	0.043091	121.477	0.040308	134.939	0.0404	149.756	0.0411	151.67	0.0518	117.308	0.0508	108.463
0.028362	1159.16	0.038976	1568.78	0.032791	2092.61	0.032981	2538.46	0.046682	123.955	0.043667	138.026	0.0437	153.89	0.0446	155.77	0.0561	119.737	0.055	110.987
0.030544	1191.88	0.041974	1612.78	0.035313	2139.6	0.035518	2599.69	0.050273	126.138	0.047026	140.766	0.0471	157.519	0.048	159.385	0.0605	121.982	0.0592	113.244
0.032725	1223.82	0.044973	1653.34	0.037835	2176.31	0.038055	2658.49	0.053863	128.093	0.050385	143.221	0.0505	160.835	0.0514	162.702	0.0648	124.062	0.0634	115.365
0.034907	1253.18	0.047971	1694.28	0.040358	2211.87	0.040592	2709.22	0.057454	130.047	0.053744	145.49	0.0538	163.897	0.0549	165.674	0.0691	126.028	0.0677	117.328
0.037089	1279.76	0.050969	1726.03	0.04288	2241.52	0.043129	2758.53	0.061045	131.77	0.057103	147.607	0.0572	166.59	0.0583	168.305	0.0734	127.852	0.0719	119.174
0.03927	1308.61	0.053967	1763.04	0.045402	2265.91	0.045666	2802.37	0.064636	133.317	0.060462	149.581	0.0606	169.218	0.0617	170.875	0.0777	129.558	0.0761	120.864
0.041452	1331.59	0.056965	1792	0.047925	2296.49	0.048203	2843.65	0.068227	134.723	0.063821	151.334	0.0639	171.6	0.0651	173.183	0.082	131.167	0.0804	122.538
0.043634	1351.55	0.059963	1815.67	0.050447	2320.48	0.05074	2882.41	0.071818	136.073	0.06718	152.885	0.0673	173.901	0.0686	175.452	0.0864	132.7	0.0846	124.109
0.045815	1372.31	0.062962	1842.65	0.05297	2342.64	0.053277	2914.88	0.075409	137.348	0.070539	154.394	0.0707	176.045	0.072	177.474	0.0907	134.167	0.0888	125.635
0.047997	1388.83	0.06596	1859.73	0.055492	2364.22	0.055814	2953.14	0.079	138.553	0.073898	155.784	0.074	178.046	0.0754	179.466	0.095	135.581	0.093	127.071
0.050179	1408.79	0.068958	1887.31	0.058014	2382.76	0.058351	2986.83	0.082591	139.719	0.077257	157.128	0.0774	180	0.0789	181.332	0.0993	136.955	0.0973	128.448
0.05236	1426.06	0.071956	1908.99	0.060537	2402.72	0.060888	3017.09	0.086181	140.853	0.080616	158.448	0.0808	181.792	0.0823	183.104	0.1036	138.272	0.1015	129.79
0.054542	1442.83	0.074954	1929.72	0.063059	2420.88	0.063425	3047.07	0.089772	141.948	0.083975	159.707	0.0841	183.502	0.0857	184.801	0.108	139.562	0.1057	131.075
0.056724	1461.01	0.077952	1952.88	0.065581	2437.88	0.065963	3080.99	0.093363	142.967	0.087334	160.878	0.0875	185.156	0.0891	186.454	0.1123	140.796	0.11	132.322
0.058905	1475.81	0.080951	1972.73	0.068104	2454.54	0.0685	3105.21	0.096954	143.985	0.090693	162.014	0.0909	186.791	0.0926	188.039	0.1166	141.989	0.1142	133.535
0.061087	1492.75	0.083949	1994.89	0.070626	2472.87	0.071037	3133.22	0.100545	144.986	0.094052	163.176	0.0942	188.372	0.096	189.631	0.1209	143.149	0.1184	134.725
0.063269	1511.68	0.086947	2016.43	0.073148	2490.8	0.073574	3170.79	0.104136	145.992	0.097411	164.288	0.0976	189.998	0.0994	191.235	0.1252	144.302	0.1227	135.885
0.06545	1540.51	0.089945	2057.36	0.075671	2516.8	0.076111	3223.05	0.107727	147.468	0.10077	166.095	0.1009	192.354	0.1029	193.509	0.1295	145.626	0.1269	137.258

## Sheet: SO2CA-Co4-2
temp. 85°C				temp. 90°C				temp. 95°C
(-)-a-pinene		(+)-a-pinene		(-)-a-pinene		(+)-a-pinene		(-)-a-pinene		(+)-a-pinene
p, kPa	a,μmol/g	p, kPa	a,μmol/g	p, kPa	a,μmol/g	p, kPa	a,μmol/g	p, kPa	a,μmol/g	p, kPa	a,μmol/g
0.0220504	10.4842	0.020707	11.7193	0.0213625	18.9257	0.0204892	21.6082	0.0511423	4.91141	0.0499358	5.00903
0.0441008	17.6334	0.041414	17.5444	0.0427249	26.8543	0.0409784	30.7217	0.102285	8.40058	0.0998717	8.51009
0.0661512	21.6349	0.062121	21.2356	0.0640874	31.1119	0.0614677	35.0609	0.153427	11.3419	0.149807	11.4845
0.0882017	24.5112	0.082828	24.0463	0.0854499	33.8911	0.0819569	38.0098	0.204569	13.9235	0.199743	14.1151
0.110252	26.9255	0.103535	26.3011	0.106812	36.1021	0.102446	40.3502	0.255712	16.245	0.249679	16.4935
0.132302	28.9715	0.124242	28.2347	0.128175	37.9974	0.122935	42.2797	0.306854	18.3783	0.299615	18.6751
0.154353	30.7998	0.144949	30.0061	0.149537	39.7254	0.143425	44.0009	0.357996	20.3512	0.349551	20.7014
0.176403	32.4975	0.165656	31.6739	0.1709	41.318	0.163914	45.5755	0.409139	22.1968	0.399487	22.6003
0.198454	34.078	0.186363	33.2104	0.192262	42.7885	0.184403	47.0432	0.460281	23.9345	0.449422	24.3938
0.220504	35.5614	0.20707	34.6572	0.213625	44.1714	0.204892	48.4176	0.511423	25.5891	0.499358	26.0902
0.242555	36.9644	0.227777	36.0211	0.234987	45.4721	0.225381	49.7119	0.562566	27.1552	0.549294	27.7119
0.264605	38.2938	0.248484	37.3194	0.25635	46.709	0.245871	50.9368	0.613708	28.6632	0.59923	29.2697
0.286655	39.5629	0.269191	38.559	0.277712	47.8823	0.26636	52.103	0.66485	30.1021	0.649166	30.7555
0.308706	40.7751	0.289898	39.7399	0.299075	49.0024	0.286849	53.2132	0.715993	31.4939	0.699102	32.1887
0.330756	41.9303	0.310605	40.876	0.320437	50.0748	0.307338	54.278	0.767135	32.8303	0.749037	33.5747
0.352807	43.0454	0.331312	41.9636	0.3418	51.1047	0.327828	55.2974	0.818277	34.1253	0.798973	34.9052
0.374857	44.1135	0.352019	43.0133	0.363162	52.0921	0.348317	56.2795	0.86942	35.3787	0.848909	36.2025
0.396907	45.1482	0.372726	44.0251	0.384524	53.0477	0.368806	57.2242	0.920562	36.5879	0.898845	37.4583
0.418958	46.1427	0.393433	45.0022	0.405887	53.9687	0.389295	58.1369	0.971704	37.7749	0.948781	38.6835
0.441008	47.1071	0.41414	45.9483	0.427249	54.858	0.409784	59.0148	1.02285	38.9205	0.998717	39.8727
0.463059	48.038	0.434847	46.8634	0.448612	55.7153	0.430274	59.8688	1.07399	40.03	1.04865	41.0231
0.485109	48.9421	0.455554	47.7508	0.469974	56.5488	0.450763	60.6934	1.12513	41.1147	1.09859	42.1513
0.50716	49.8161	0.476261	48.6071	0.491337	57.3531	0.471252	61.4887	1.17627	42.18	1.14852	43.2435
0.52921	50.6633	0.496968	49.4393	0.512699	58.1335	0.491741	62.2653	1.22742	43.2121	1.19846	44.319
0.55126	51.487	0.517675	50.2473	0.534062	58.8926	0.51223	63.0125	1.27856	44.2193	1.2484	45.3613
0.573311	52.284	0.538382	51.0311	0.555424	59.6279	0.53272	63.741	1.3297	45.1932	1.29833	46.3731
0.595361	53.0575	0.559089	51.7873	0.576787	60.3419	0.553209	64.4456	1.38084	46.1451	1.34827	47.3682
0.617412	53.8042	0.579796	52.5228	0.598149	61.0267	0.573698	65.1261	1.43199	47.0776	1.3982	48.3329
0.639462	54.5241	0.600503	53.2272	0.619512	61.693	0.594187	65.7799	1.48313	47.9824	1.44814	49.2643
0.661512	55.2106	0.62121	53.9108	0.640874	62.3274	0.614677	66.4044	1.53427	48.854	1.49807	50.168
